# Supplementary material for: Circuit quantum acoustodynamics with surface acoustic waves
Source: PubMed Central journal article supplement (PMC5715021; doi:10.1038/s41467-017-01063-9), 2017-10-17
Supplement: 41467_2017_1063_MOESM1_ESM.pdf [file 41467_2017_1063_MOESM1_ESM.pdf]

## 304 **Supplementary Note 1: Device parameters**

305 In Supplementary Fig. 1, we present a schematic of a tuneable transmon embedded in a 2-port  
306 SAW resonator. The acoustic resonator consists of two interdigitated transducers (IDTs) and two  
307 gratings. Each IDT is an interdigitated capacitance with  $N_t = 51$  fingers. The periodicity of the  
308 transducers is  $\lambda_0 = 6 \mu\text{m}$  and their horizontal length is  $L_t = (2N_t - 1)\lambda_0/4 = 151.5 \mu\text{m}$ . One bus  
309 bar of the IDT is grounded whereas the opposite one is connected to a waveguide. As regards the  
310 gratings, they consist of  $N_g = 400$  shorted metallic strips connected to ground with a periodicity of  
311  $\lambda_0/2$ . The horizontal length of each grating is  $L_g = (2N_g - 1)\lambda_0/4 = 1198.5 \mu\text{m}$ . In the remainder,  
312 we will call the left and right transducers  $\text{IDT}_1$  and  $\text{IDT}_2$  respectively. The same nomenclature is  
313 adopted for the gratings.

314 For optimal reflection, the minimal distance between  $\text{IDT}_1$  and grating<sub>1</sub> must satisfy the re-  
315 lation  $d_1 = (n_1/2 - 1/4)\lambda_0 - \lambda_0/8$ , where  $n_1 \in \mathbb{N}^+$ . To minimise the cavity length we opted  
316 for  $n_1 = 3$ , leading to  $d_1 = 6.75 \mu\text{m}$  (a lower value of  $n_1$  might have caused some fabrication is-  
317 sues). The distance  $d_4$  between  $\text{IDT}_2$  and grating<sub>2</sub> is the same as  $d_1$ . Finally, the minimal distance  
318 between the two IDTs satisfies the relation  $\Delta_0 = (n_2 - 3/4)\lambda_0$  where  $n_2 \in \mathbb{N}^+$ . The value of  
319  $n_2$  can be chosen based on some considerations. From previous experiments<sup>1</sup>, it has been noted  
320 that the internal quality factor of a SAW resonator increases as the distance between the two grat-  
321 ings increases. It has also been observed that the number of longitudinal modes supported by the  
322 acoustic cavity increases with increasing distance between the two gratings. Lastly, the coupling  
323 between the qubit and the SAWR is inversely proportional to the square root of the acoustic cavity

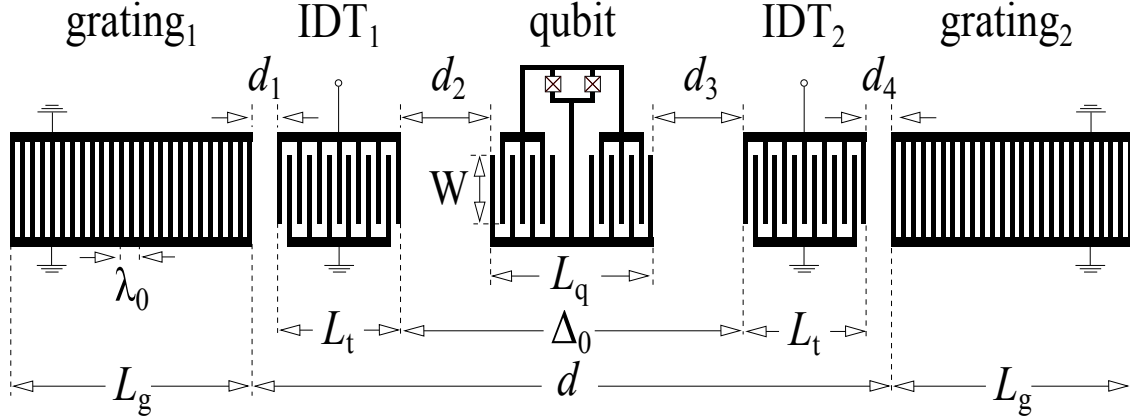

**Supplementary Figure 1 | Schematic of a transmon qubit embedded in a 2-port SAW resonator.** The 2-port SAW resonator consists of two IDTs and two gratings. The tuneable qubit is formed by a SQUID shunted by an interdigitated capacitance. Due to limited space, the device represented in this figure is not in scale and the number of fingers in the qubit, IDTs and gratings has been reduced with respect to the real device (see text for further details).

324 area (see Supplementary Note 2). For a better coherence, we aimed at having an internal quality  
 325 factor as high as possible; at the same time, we wanted to maximise the acoustic coupling and we  
 326 wanted our cavity to support a small number of longitudinal modes. For these reasons, we have set  
 327  $n_2$  to the reasonable value of 158 and therefore  $\Delta_0 = 943.5 \mu\text{m}$ . As explained in the main text, our  
 328 acoustic cavity supports three longitudinal modes separated by about 1 MHz.

329 The tuneable transmon is placed in the middle of the acoustic cavity. It consists of a  $4 \times$   
 330  $4.57 \mu\text{m}^2$  SQUID shunted by an interdigitated capacitance. The capacitance of the qubit resembles  
 331 a transducer itself: it consists of  $N_q = 30$  fingers with one additional central finger connecting  
 332 the two electrodes of the capacitance (see Supplementary Fig. 1). The interdigitated structure of  
 333 the qubit capacitance has the same periodicity as the IDTs. Unlike these acoustic components, the  
 334 qubit is connected neither to ground nor to any other waveguide (it is only capacitively coupled to

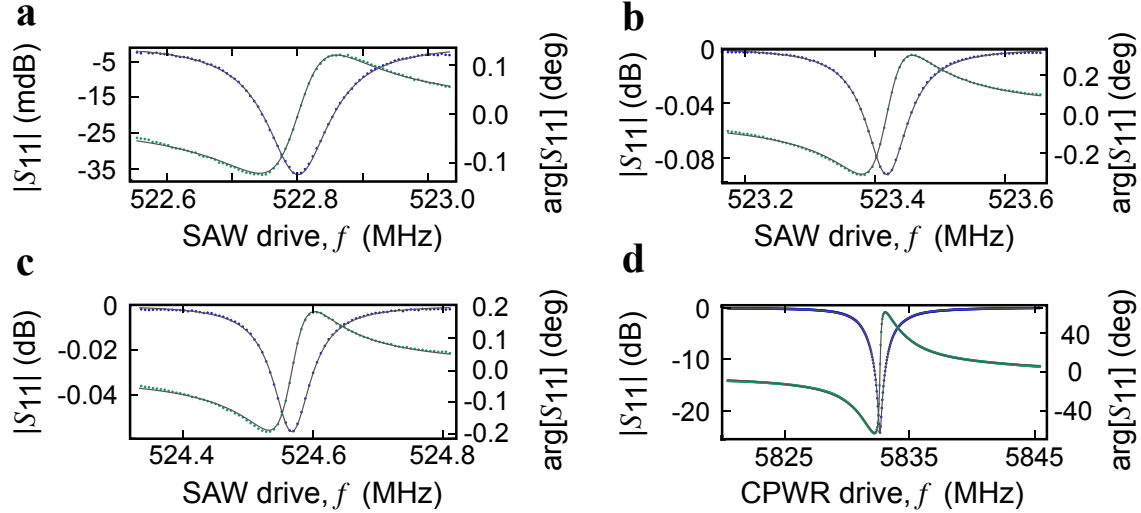

**Supplementary Figure 2 | Reflection coefficient of the 2-port SAWR and CPWR.** **a-c**, Magnitude (blue) and phase (green) of the measured reflection coefficient  $S_{11}(f)$  of the longitudinal modes  $f_{m1}$ ,  $f_{m2}$  and  $f_{m3}$ . Solid lines are a fit to equation (1). **d**, Magnitude (blue) and phase (green) of the measured reflection coefficient  $S_{11}(f)$  of the CPWR mode  $f_r$ . Solid lines are a fit to equation (1). A background due to the measurement setup has been subtracted in all these frequency responses.

335 ground and to a CPWR not shown in the figure).

336 The length of the fingers in the IDTs and qubit is denoted by  $W$ . A large value of  $W$  would  
 337 considerably decrease diffraction losses<sup>1</sup>; at the same time, a small value of  $W$  would decrease the  
 338 acoustic cavity area and increase the acoustic coupling (see Supplementary Note 2). A tradeoff  
 339 between these two limits lead us to  $W = 11.66\lambda_0 = 70\ \mu\text{m}$ . Note that at low temperatures, the  
 340 device undergoes a non-isotropic contraction and the distances between, as well as the dimensions  
 341 of the acoustic components may vary on the order of tens of nanometers.

342 By applying an oscillating voltage to one IDT, it is possible to generate a surface acoustic

343 wave. The frequency of the wave is given by the simple formula  $f = v_e/\lambda$ , where  $v_e$  is an effective  
344 speed of sound. An optimal transduction is achieved when  $\lambda = \lambda_0$ , which leads to the central  
345 resonant frequency of the device  $f_0 = v_e/\lambda_0$ . Assuming that  $f_{m2}$  is the central resonance, we can  
346 extract an effective speed of sound of  $v_e = \lambda_0 \times f_{m2} = 3140.6$  m/s. The acoustic wave is eventually  
347 collected by the second transducer generating a potential difference on its electrodes. In our setup,  
348 we used a vector network analyzer (VNA) to acquire the transmitted signal from IDT<sub>1</sub> to IDT<sub>2</sub>;  
349 the results of this measurement are shown in Fig. 2a of the main text. The SAWR can also be  
350 measured in reflection. In Supplementary Fig. 2a-c we present the measured reflection coefficient  
351  $S_{11}(f)$  of the 2-port SAW resonator around the three longitudinal modes  $f_{m1}$ ,  $f_{m2}$  and  $f_{m3}$ . Close to  
352 resonance, the SAWR can be modelled with an *RLC* equivalent circuit. According to this model,  
353 the analytical expression of the reflection coefficient takes the form:

$$S_{11}(f) = \frac{(Q_{m,e} - Q_{m,i})/Q_{m,e} + 2iQ_{m,i}(f - f_m)/f}{(Q_{m,e} + Q_{m,i})/Q_{m,e} + 2iQ_{m,i}(f - f_m)/f}. \quad (1)$$

354 Here  $Q_{m,i}$  is the internal quality factor of the mechanical mode and  $Q_{m,e}$  is the external quality  
355 factor due to the presence of the IDT and measurement port. From a fit to the experimental data,  
356 we find  $Q_{m1,i} = 4830$ ,  $Q_{m2,i} = 7020$ ,  $Q_{m3,i} = 7600$ ,  $Q_{m1,e} = 2.34 \times 10^6$ ,  $Q_{m2,e} = 1.33 \times 10^6$ ,  
357 and  $Q_{m3,e} = 2.33 \times 10^6$ . In terms of loss rate, these values can be expressed as  $\kappa_{m1} = 108$  kHz,  
358  $\kappa_{m2} = 75$  kHz and  $\kappa_{m3} = 69$  kHz.

359 For completeness, we also report the measured reflection coefficient of the CPWR in Sup-  
360 plementary Fig. 2d. Its resonant frequency depends on its length  $L_r$  and the effective dielectric  
361 constant of the substrate  $\epsilon_{\text{eff}}$  in the following way:  $f_r = c/2L_r\sqrt{\epsilon_{\text{eff}}}$ , where  $L_r = 14\,100$   $\mu\text{m}$ , and  
362  $\epsilon_{\text{eff}} \approx 3.3$  for quartz. Finally, by fitting the CPWR response in the frequency domain, we ob-

363 tain  $Q_{m2,i} = 3240$  and  $Q_{m3,e} = 3630$ . In terms of loss rate, these values can be expressed as  
 364  $\kappa_r = 3.41$  MHz.

365 When the wave bounces against the mirrors, it slightly penetrates into this regular array of  
 366 metallic fingers. The distance that the wave travels into this periodic structure is called penetration  
 367 depth  $L_p$ . The longitudinal cavity length is given by the sum of the distance between the two  
 368 gratings and the penetration depth into them:  $L_c = d + 2L_p$ . From the frequency difference between  
 369  $f_{m3}$  and  $f_{m2}$ , we can extract the cavity length:  $L_c = v_e/2|f_{m3} - f_{m2}| = 1370 \mu\text{m}$ . As explained in  
 370 the main text, this value is in agreement with measurements performed in the time domain. From  
 371 the value of the cavity length, we can derive the penetration depth  $L_p = 55 \mu\text{m}$ . The reflectivity  $|r_s|$   
 372 of each finger in the grating can be easily obtained from the relation  $4|r_s|L_p = \lambda_0 \tanh(|r_s|N_g)$ ,  
 373 whence  $r_s = |0.0273|$ . All of the parameters presented so far are listed in Supplementary Table 1.

374 We conclude this section presenting some observations concerning the coherence time of our  
 375 qubit. In order to extract the decay time  $T_1$  of our transmon, we performed an inversion recovery  
 376 experiment. The pulse scheme used to extract  $T_1$  is shown in the inset of Supplementary Fig. 3a: a  
 377  $\pi$  pulse is applied to the qubit followed by a readout pulse at the CPWR frequency. Supplementary  
 378 Fig. 3a shows the exponential decay of the qubit population as a function of the delay between the  
 379 two pulses. The data points fit well to the exponential model:

$$P_e(t) = \frac{1 + \langle \hat{\sigma}_z(t) \rangle}{2} = A + B \exp(-\Delta t/T_1), \quad (2)$$

380 where  $A = 32.878$  mV is an offset,  $B = 0.3496$  mV is a scaling factor and  $T_1 = 46$  ns is the  
 381 decay time of the qubit (this experiment has been performed with the qubit frequency fixed at

|       |                                                        |                                                                                                                                                       |
|-------|--------------------------------------------------------|-------------------------------------------------------------------------------------------------------------------------------------------------------|
| Qubit | Coulomb energy                                         | $E_C = 0.310$ GHz                                                                                                                                     |
|       | Maximum Josephson energy                               | $E_{J0} = 10.704$ GHz                                                                                                                                 |
|       | $E_{J0}/E_C$                                           | 34.5                                                                                                                                                  |
|       | Relaxation time                                        | $T_1 = 46$ ns (at $f_q = 2.6$ GHz)                                                                                                                    |
|       | Dephasing time                                         | $T_2 = 67$ ns (at $f_q = 2.6$ GHz)                                                                                                                    |
|       | Qubit frequency                                        | $f_q(\Phi) = \left( \sqrt{8E_C E_{J0} \cos  \pi\Phi/\Phi_0 } - E_C \right) / h$                                                                       |
| CPWR  | Resonant frequency and linewidth                       | $f_r = 5.83$ GHz $\kappa_r = 3.41$ MHz                                                                                                                |
|       | Internal and external quality factor                   | $Q_{r,i} = 3240$ $Q_{r,e} = 3630$                                                                                                                     |
|       | Qubit - CPWR coupling strength                         | $g = 69$ MHz                                                                                                                                          |
| SAWR  | Resonant frequencies and linewidths<br>(in reflection) | $f_{m1} = 522.825$ MHz $\kappa_{m1} = 108$ kHz<br>$f_{m2} = 523.426$ MHz $\kappa_{m2} = 75$ kHz<br>$f_{m3} = 524.575$ MHz $\kappa_{m3} = 69$ kHz      |
|       | Internal/external quality factors<br>(in reflection)   | $Q_{m1,i} = 4830$ $Q_{m1,e} = 2.34 \times 10^6$<br>$Q_{m2,i} = 7020$ $Q_{m2,e} = 1.33 \times 10^6$<br>$Q_{m3,i} = 7600$ $Q_{m3,e} = 2.33 \times 10^6$ |
|       | Periodicity                                            | $\lambda_0 = 6$ $\mu$ m                                                                                                                               |
|       | Effective speed of sound                               | $v_e = 3140.6$ m/s                                                                                                                                    |
|       | Fingers in each IDT                                    | $N_t = 51$                                                                                                                                            |
|       | Fingers in each grating                                | $N_g = 400$                                                                                                                                           |
|       | Fingers in the qubit capacitance                       | $N_q = 31$                                                                                                                                            |
|       | Length of each finger                                  | $W = 70$ $\mu$ m = $11.66\lambda_0$                                                                                                                   |
|       | Distance between grating and IDT                       | $d_1 = (n_1/2 - 1/4)\lambda_0 - \lambda_0/8 _{n_1=3} = 6.75$ $\mu$ m                                                                                  |
|       | Distance between gratings                              | $d = 1260$ $\mu$ m = $v_e \times 401$ ns =                                                                                                            |
|       | Distance between centre of IDTs                        | $d_{\text{IDT}} = 1100$ $\mu$ m                                                                                                                       |
|       | Cavity length                                          | $L_c = 1365$ $\mu$ m                                                                                                                                  |
|       | Cavity area                                            | $A = W \times L_c = 95\,900$ $\mu$ m <sup>2</sup>                                                                                                     |
|       | Qubit - SAWR coupling strength                         | $\lambda_{m2}(f_q = 2.5$ GHz) = $5.7$ MHz                                                                                                             |

Supplementary Table 1 | Device parameters.

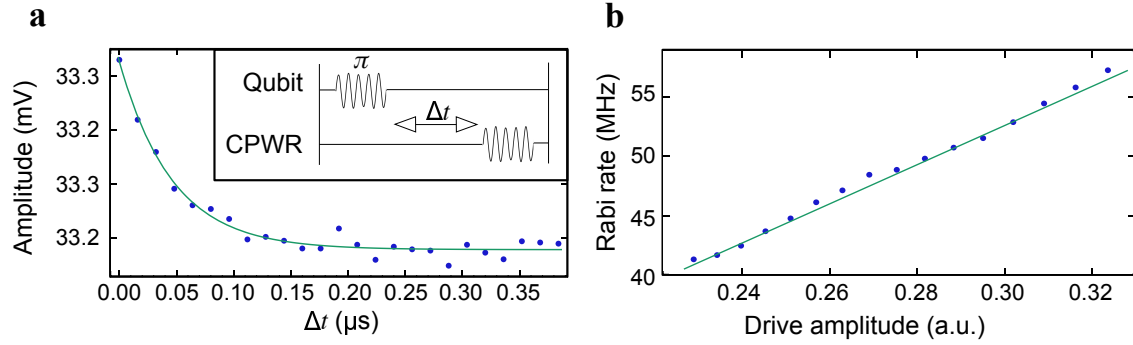

**Supplementary Figure 3 | Qubit coherence.** **a**, Inversion recovery experiment to extract the qubit decay time  $T_1$ .

The solid green curve based on equation (2) fits well the data points (blue dots). **b**, Rabi rate for different values of drive amplitude (blue points). As expected, the data points fit well to a linear dependence (green solid line).

382  $f_q = 2.9$  GHz). We have also performed Rabi oscillations of the qubit using the CPWR as readout.

383 Supplementary Fig. 3b shows the frequency of Rabi oscillations as a function of drive amplitude:

384 as expected, there is a linear dependence between these two variables.

### 385 **Supplementary Note 2: Coupling strength between a charge qubit and a SAW cavity**

386 When a surface perturbation on a piezoelectric crystal travels through an interdigitated capacitor

387 with the same periodicity as the incoming wave, the capacitor develops an oscillating voltage on

388 its electrodes. This phenomenon can be exploited to couple a surface acoustic wave to a transmon

389 with a suitably shaped capacitance. The coupling strength between a transmon and a SAW cavity

390 can be calculated by considering the charge  $q$  and the potential difference  $V_0$  generated by a single

391 phonon on the electrodes of the transmon. Let us first derive the potential difference  $V_0$ . The

392 zero-point mechanical motion associated to a single phonon inside a SAW cavity is:

$$U_0 = \sqrt{\frac{\hbar}{2\rho A_c v_e}}, \quad (3)$$

393 where  $A = W \times L_c = 95\,900\,\mu\text{m}^2$  is the area of the acoustic cavity and  $\rho = 2647\,\text{kg/m}^3$  is the  
 394 quartz mass density. From the zero-point mechanical motion, we can easily derive the value of the  
 395 zero-point electric potential<sup>2</sup>:

$$\phi_0 \approx \frac{e_{\text{pz}}}{\varepsilon} U_0 = \frac{e_{\text{pz}}}{\varepsilon} \sqrt{\frac{\hbar}{2\rho A_c v_e}}, \quad (4)$$

396 where  $\varepsilon$  is the permittivity of the substrate and  $e_{\text{pz}}$  is a component of the quartz piezoelectric  
 397 tensor which depends on the propagation direction (for ST-X quartz<sup>3</sup>,  $e_{\text{pz}}/\varepsilon \approx 2.0\,\text{V/nm}$ ). As  
 398 mentioned earlier, the transmon capacitance responds in a more effective way to waves sharing the  
 399 same periodicity of its structure. Hence, the electric potential  $\phi_0$  has to be scaled according to the  
 400 following normalised array factor<sup>3</sup>:

$$A(f) = \left| \frac{\sin [N_q \pi (f - f_0) / 2f_0]}{N_q \pi (f - f_0) / 2f_0} \right|. \quad (5)$$

401 Note that for  $f = f_0$ ,  $A(f) = 1$ . The potential difference is thus  $V_0 = \phi_0 A(f)$ . As regards the  
 402 charge generated by the surface acoustic wave on the transmon electrodes, its value is given by:

$$\hat{q} = 2e\beta\hat{n} \quad (6)$$

403 where  $2e$  is the charge of a Cooper pair,  $\beta$  is a prefactor,  $|j\rangle$  is an eigenstate of the transmon  
 404 and  $\hat{n}$  is a quantum operator indicating the number of Cooper pairs in excess (or deficit) on the  
 405 superconducting island. To calculate the coupling in the transmon eigenbasis, we need the matrix  
 406 element<sup>4</sup>:

$$\langle j+1 | \hat{q} | j \rangle = 2e\beta \langle j+1 | \hat{n} | j \rangle \approx 2e\beta \sqrt{\frac{j+1}{2}} \left( \frac{E_J(\phi)}{8E_C} \right)^{1/4}. \quad (7)$$



407 For the first two levels of the transmon, we have  $\langle 1|\hat{q}|0\rangle \approx e\beta (E_J(\phi)/2E_C)^{1/4}$ . It remains to  
 408 calculate the prefactor  $\beta$ . This parameter originates from the fact that not all of the charge generated  
 409 by the surface acoustic wave will be localised on the transmon capacitance: part of it will be  
 410 distributed on the gate capacitance  $C_2$ , on the junction capacitance  $C_J$  and strain capacitances  $C_s$   
 411 to ground planes and other metallic components of the chip. Hence:

$$\beta = \frac{C_q}{C_2 + C_s + C_J + C_q} = \frac{C_q}{C_\Sigma}. \quad (8)$$

412 where  $C_q = WN_q\varepsilon/2$  is the capacitance of the qubit interdigitated structure. The coupling strength  
 413 between a transmon and a SAW cavity can be written as follows:

$$\begin{aligned} \lambda(\phi, f) &= \frac{\langle 1|\hat{q}|0\rangle V_0}{h} \approx \frac{2e}{h} \beta \langle 1|\hat{n}|0\rangle \phi_0 A(f) = \\ &= \frac{e\beta}{h} \left( \frac{E_J(\phi)}{2E_C} \right)^{1/4} \phi_0 A(f), \end{aligned} \quad (9)$$

414 where the value of  $E_J(\phi)$  depends on the qubit frequency in the following way  $E_J(\phi) = [hf_q(\phi) +$   
 415  $E_C]^2/8E_C$ . Substituting values related to our device and assuming that the frequency of the qubit  
 416 is  $f_q = 2.52$  GHz and approximating  $\beta \approx 1$  and  $A(f) \approx 1$ , we have:

$$\begin{aligned} \lambda &\approx \frac{e}{h} \left( \frac{3.4 \text{ [GHz]}}{2.0 \times 0.31 \text{ [GHz]}} \right)^{1/4} 2 \left[ \frac{\text{nV}}{\text{m}} \right] \sqrt{\frac{\hbar}{2 \times 2647 \text{ [kg/m}^3\text{]} \times 95 \text{ 900 [}\mu\text{m}^2\text{]} \times 3140.6 \text{ [m/s]}}} = \\ &= 6.0 \text{ MHz}. \end{aligned} \quad (10)$$

417 This value agrees well with the experimental value extracted from our measurements.

### 418 **Supplementary Note 3: Cryogenic setup and fabrication procedure**

419 The device presented in this work has been characterised at cryogenic temperatures. The microchip  
 420 has been bonded on a circuit board, placed inside a home-made oxygen-free copper sample holder

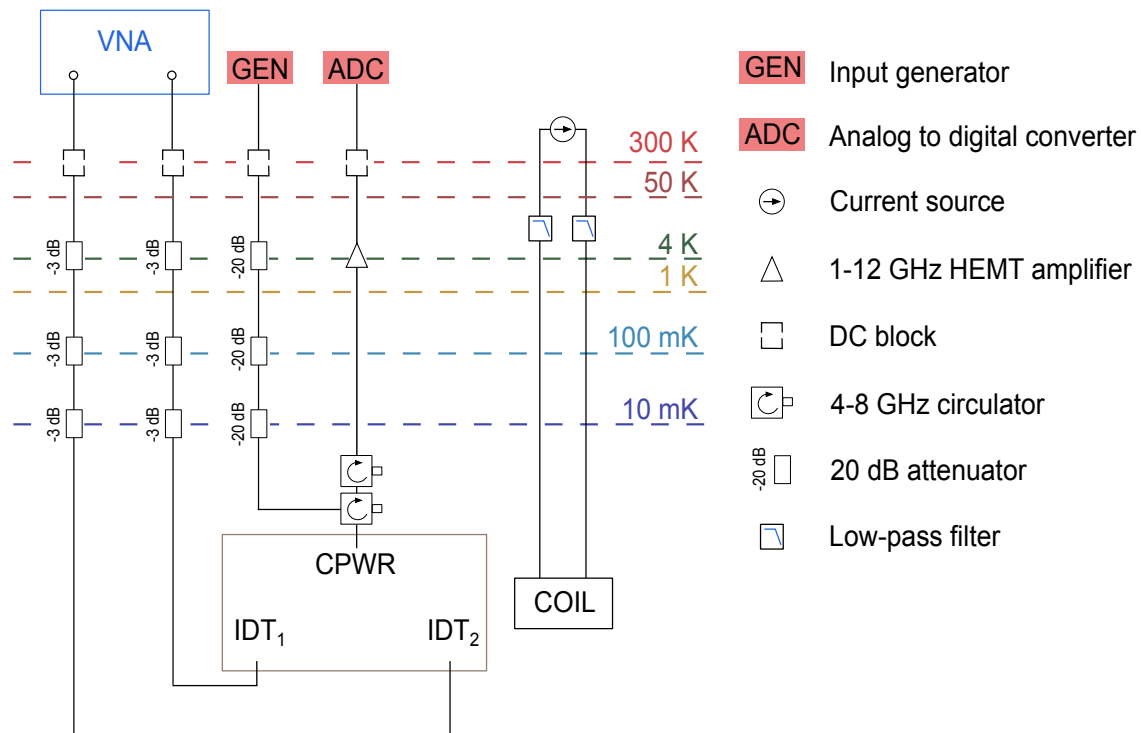

**Supplementary Figure 4 | Cryogenic setup.** Schematic of our experimental setup, showing the microwave control and measurement circuit connected to the sample, embedded in a dilution refrigerator.

421 and mechanically anchored to the 10 mK plate of a dilution refrigerator (Triton200, Oxford Instru-  
422 ments). The microwave line connecting the CPWR to the external instrumentation is highly atten-  
423 uated by means of three  $-20$  dBm attenuators. The measured attenuation of this line is  $-67$  dB.  
424 The reflected signal coming from the CPWR passes through two 4-8 GHz circulators and reaches  
425 a 1-12 GHz HEMT cold amplifier (see Supplementary Fig. 4). The signal is then downconverted  
426 and acquired using an analog-to-digital converter at room temperature. The lines connecting  $IDT_1$   
427 and  $IDT_2$  to the VNA have an estimated overall attenuation of  $-16$  dB.

428 We conclude this section presenting the fabrication procedure of our device. First of all,  
429 the ground planes, alignment marks and waveguides have been patterned with standard photolitho-  
430 graphic techniques. These 100 nm thick metallic structures have been deposited with a home-made  
431 electron-beam evaporator. The SAWR and the qubit have been patterned together in a second  
432 electron-beam lithography step. The  $200 \times 200$  nm<sup>2</sup> junctions have been fabricated with the usual  
433 Dolan bridge technique and with a double angle evaporation in the following way: firstly 30 nm of  
434 aluminium have been deposited, followed by an in-situ oxidation step and a second deposition of  
435 60 nm of aluminium. The overall height of the qubit and SAWR is therefore 90 nm.

### 436 **Supplementary References**

- 437 1. Manenti, R. *et al.* Surface acoustic wave resonators in the quantum regime. *Phys. Rev. B* **93**,  
438 041411 (2016).
- 439 2. Schuetz, M. J. A. *et al.* Universal Quantum Transducers Based on Surface Acoustic Waves.  
440

441 *Phys. Rev. X* **5**, 031031 (2015).

442 3. Morgan, D., *Surface Acoustic Wave Filters*. (Academic Press, Amsterdam, 2007).

443 4. Koch, J. *et al.* Charge-insensitive qubit design derived from the Cooper pair box. *Phys. Rev. A*

444 **76**, 042319 (2007).
